# Supplementary material
Source: Research Square preprint supplement (doi:10.21203/rs.3.rs-9172519/v1)
Supplement: Supplementary file 1 [file c085e1f38184bbc5ec452943.docx]

**Supplementary Table S1. Agreement CT scan – MRI for cN1 disease**

Legend: CT, computed tomography; MRI, magnetic resonance imaging; cN1, clinically node-positive (based on conventional imaging); RP, radical prostatectomy; ISUP GG, International Society of Urological Pathology Grade Group;

| Agreement CT-MRI for cN1 disease | Raw agreement (%) | Cohen’s κ ± SE | Agreement* |
| --- | --- | --- | --- |
| Whole cohort | 94.0 | 0.51 ±0.09 | moderate |
| RP patients | 92.7 | 0.35 ±0.13 | fair |
| Non-surgical patients | 95.1 | 0.70 ±0.12 | substantial |
| ISUP GG 3 patients | 96.8 | 0.23 ±0.20 | fair |
| ISUP GG 4 patients | 90.1 | 0.56 ±0.12 | moderate |
| ISUP GG 5 patients | 90.7 | 0.56 ±0.17 | moderate |

* Landis JR, Koch GG. The Measurement of Observer Agreement for Categorical Data. Biometrics 1977;33:159. https://doi.org/10.2307/2529310.

**Supplementary Table S2. Radical prostatectomy pathology**

Legend: RP, radical prostatectomy; ISUP GG, International Society of Urological Pathology Grade Group; pT stage, pathologic tumour stage; R1 margin, positive surgical margin; LND, lymph node dissection. One patient underwent RP in another centre and was lost to follow-up.

| Variable |  | RP patients  N= 220* |
| --- | --- | --- |
| RP ISUP GG | 2 | 9 (4.1%) |
|  | 3 | 139 (63.5%) |
|  | 4 | 40 (18.3%) |
|  | 5 | 31 (14.2%) |
| pT stage | pT2a or T2b | 23 (10.5%) |
|  | pT2c | 59 (26.3%) |
|  | pT3a | 84 (38.4%) |
|  | pT3b or more | 53 (24.2%) |
| R1 margin |  | 45 (20.5%) |
| LND performed |  | 215 (98.2%) |
| Nodal status |  |  |
|  | pN0 | 169 (77.2%) |
|  | pN1 | 45 (20.5%) |
|  | pM1a | 1 (0.5%) |
|  | pNx | 4 (1.8%) |
| Total nodes removed |  | 19 (14-25) |

*One patient underwent RP in another centre and pathology results are missing.

**Supplementary Table S3. Diagnostic parameters for pN staging (RP patients, N=220)**

Legend: pN, nodal status at final pathology; RP, radical prostatectomy; MRI, magnetic resonance imaging; CT, computed tomography; PPV, positive predictive value; NPV, negative predictive value; AUC, area under the Receiver Operating Characteristics (ROC) Curve; ; κ, Cohen’s kappa

|  | Sensitivity | Specificity | PPV | NPV | AUC° | κ | Agreement** |
| --- | --- | --- | --- | --- | --- | --- | --- |
| MRI | 15.2 | 97.0 | 58.3 | 80.7 | 0.56 (p=0.23) | 0.17 ± 0.07 | slight |
| CT scan | 19.6 | 97.6 | 69.2 | 81.7 | 0.58  (p=0.09) | 0.23 ± 0.08 | fair |
| PSMA PET/CT* | 87.0 | 85.7 | 76.9 | 92.3 | 0.86 (p<0.001) | 0.71 ± 0.09 | substantial |

*based on the RP patients staged also by molecular imaging (PSMA sub-cohort, N=65)

° p values are referred to the null hypothesis that true AUC = 0.5

** Landis JR, Koch GG. The Measurement of Observer Agreement for Categorical Data. Biometrics 1977;33:159. https://doi.org/10.2307/2529310.

**Supplementary Table S4. Results of distant metastasis staging by conventional imaging stratified by nodal status and treatment assignment.**

| Stratum |  | Patients | CT/Bs-M0 | CT/Bs-M1a | CT/Bs-M1b | p* |
| --- | --- | --- | --- | --- | --- | --- |
|  |  | N (%) | N(%) | N(%) | N(%) |  |
| Whole cohort |  | 321 (100) | 298 (92.8) | 11 (3.4) | 12 (3.7) | - |
| MRI-N | MRI-N0 | 299 (100) | 283 (97.6) | 3 (1.4) | 2 (1.0) | p<0.001 |
|  | MRI-N1 | 22 (100) | 15 (68.2) | 3 (13.6) | 4 (18.2) |  |
| Treatment | RP | 220 (100) | 215 (97.7) | 3 (1.4) | 2 (0.9) | p<0.001 |
|  | Non-surgical | 101 (100) | 83 (82.2) | 8 (7.9) | 10 (9.9) |  |

*p value is referred to Pearson’s Chi-squared test within each stratum

Legend: N, number of patients per cohort/sub-cohort; CT/Bs, computed tomography scan and bone scan; M0, non-metastatic; M1a; nodal metastasis (extra-pelvic nodes); M1b (bone metastasis); N0, node-negative (pelvic nodes); N1, node-positive disease (pelvic nodes); RP, radical prostatectomy

**Supplementary Table S5**. Additional finding detail at CT scan (per-finding analysis). Tables reports absolute counts (N).

| Additional CT scan finding | Urgent management | Follow-up needed | | Low relevance or already known | Total |
| --- | --- | --- | --- | --- | --- |
| Cyst (any organ) | 0 | 0 | | 66 | 66 |
| Bowel diverticulosis | 0 | | 0 | 25 | 25 |
| Angioma (any organ) | 0 | 0 | | 16 | 16 |
| Suspect nodule (non-prostate) | 5 | 5 | | 0 | 10 |
| Pulmonary micronodule or nodule | 2 | 6 | | 0 | 8 |
| Hernia (any location) | 0 | 8 | | 0 | 8 |
| Renal stone | 0 | 6 | | 0 | 6 |
| Hydronephrosis or ureteral stone | 5 | 1 | | 0 | 6 |
| Bladder stone or diverticulum | 2 | 2 | | 1 | 5 |
| Adrenal incidentaloma | 0 | 3 | | 0 | 3 |
| Enlarged lymph node (non-prostate) | 0 | 3 | | 0 | 3 |
| Vascular aneurysm | 0 | 2 | | 0 | 2 |
| Other | 3 | 5 | | 7 | 15 |
| Total | 17 | 41 | | 115 | 173 |

**Supplementary Table S6**. Clinical yield of CT scan (post-hoc analysis, incorporating clinical judgement and all information available including PSMA-PET/CT, pathology and clinical follow-up)

|  | CT confirms MRI- N0M0* | CT confirms MRI-N1/M1* | CT scan upstages MRI (N/M)* | CT needed for MRI/Bs suspect* | CT scan downstages MRI (N/M) | Urgent non-PCa finding | Misleading CT results** | Total |
| --- | --- | --- | --- | --- | --- | --- | --- | --- |
| Whole cohort, N (%) | 249 (78.1) | 14 (4.4) | 6 (1.9) | 8 (2.5) | 21 (6.6) | 10 (3.1) | 11(3.5) | 323 (100) |
| Prostatectomy cohort, N (%) | 177 (80.5) | 5 (2.3) | 5 (2.3) | 2 (0.9) | 17 (7.8) | 8 (3.6) | 6 (2.7) | 220 (100) |
| Non-surgical treatment cohort, N (%) | 72 (72.7) | 9 (9.1) | 1 (1.0) | 6 (6.1) | 4 (4.0) | 2 (2.0) | 5 (5.0) | 103 (100) |
| Clinical yield | % Limited CT added value | | % True upstaging of negative/suspect MRI/BS | | % True downstaging of positive/suspect MRI/Bs | % CT relevant for management | % CT confounding | NNS (95% CI) |
| Whole cohort | 82.5 | | 14.0 | | | | 3.5 | 7.2 (5.6-9.9) |
| Prostatectomy cohort | 82.8 | | 14.6 | | | | 2.7 | 6.8 (5.2 – 10.2) |
| Non-surgical treatment cohort | 81.8 | | 13.1 | | | | 5.0 | 7.9 (5.2 – 16.1) |

*included Bone scan results

** CT suggests upstaging/downstaging which is not confirmed at subsequent investigations (eg. PSMA-PET/CT, multidisciplinary evaluation, pathology etc).

Legend: CT, computed tomography; MRI, magnetic resonance imaging; N0, node-negative; M0, no distant metastasis; N1, node-positive (pelvic); M1 distant metastasis present; PCa, prostate cancer; NNS, number needed to scan; CI, confidence interval.
